# Supplementary material
Source: MDPI journal article supplement (https://www.mdpi.com/2071-1050/15/5/3965)
Supplement: s1 [file s1]

**Supplementary Materials: The calculation results of the level-1 indicators for green development in China**

**Table S1.** Calculation Results of Resource Utilization Indicators of Provinces in Eastern China (2005-2012).

|           | 2005   | 2006   | 2007   | 2008   | 2009   | 2010   | 2011   | 2012   |
|-----------|--------|--------|--------|--------|--------|--------|--------|--------|
| Beijing   | 0.5923 | 0.6129 | 0.6392 | 0.6730 | 0.6924 | 0.7211 | 0.7453 | 0.7806 |
| Tianjin   | 0.5941 | 0.6222 | 0.6364 | 0.6933 | 0.6970 | 0.7341 | 0.7729 | 0.7925 |
| Hebei     | 0.4756 | 0.4955 | 0.5262 | 0.5663 | 0.5812 | 0.6192 | 0.6582 | 0.6760 |
| Shanghai  | 0.5619 | 0.6031 | 0.6360 | 0.6609 | 0.6599 | 0.6921 | 0.7245 | 0.7363 |
| Jiangsu   | 0.4932 | 0.5224 | 0.5624 | 0.6058 | 0.6304 | 0.6664 | 0.7136 | 0.7402 |
| Zhejiang  | 0.5218 | 0.5603 | 0.5861 | 0.6120 | 0.6263 | 0.6651 | 0.7011 | 0.7159 |
| Fujian    | 0.4229 | 0.4432 | 0.4556 | 0.5245 | 0.5579 | 0.6085 | 0.6503 | 0.6795 |
| Shandong  | 0.5842 | 0.6087 | 0.6404 | 0.6869 | 0.7043 | 0.7293 | 0.7590 | 0.7774 |
| Guangdong | 0.4845 | 0.5343 | 0.5669 | 0.5982 | 0.6191 | 0.6437 | 0.6773 | 0.6950 |
| Hainan    | 0.5345 | 0.5373 | 0.5466 | 0.5919 | 0.5994 | 0.6534 | 0.6624 | 0.7361 |

**Table S2.** Calculation Results of Resource Utilization Indicators of Provinces in Eastern China (2013-2020).

|           | 2013   | 2014   | 2015   | 2016   | 2017   | 2018   | 2019   | 2020   |
|-----------|--------|--------|--------|--------|--------|--------|--------|--------|
| Beijing   | 0.8081 | 0.8229 | 0.8601 | 0.8768 | 0.8040 | 0.8228 | 0.8559 | 0.8791 |
| Tianjin   | 0.8167 | 0.8313 | 0.8413 | 0.8527 | 0.8423 | 0.8587 | 0.8616 | 0.8546 |
| Hebei     | 0.7002 | 0.6973 | 0.6982 | 0.7141 | 0.7129 | 0.7144 | 0.7258 | 0.7279 |
| Shanghai  | 0.6909 | 0.7582 | 0.7500 | 0.7605 | 0.7761 | 0.7757 | 0.7717 | 0.7838 |
| Jiangsu   | 0.7571 | 0.7600 | 0.7864 | 0.7217 | 0.8180 | 0.7933 | 0.8188 | 0.8142 |
| Zhejiang  | 0.7341 | 0.7388 | 0.7498 | 0.7725 | 0.7825 | 0.7854 | 0.7969 | 0.8085 |
| Fujian    | 0.7078 | 0.7079 | 0.7238 | 0.7560 | 0.7585 | 0.7492 | 0.7600 | 0.7806 |
| Shandong  | 0.8082 | 0.8154 | 0.8214 | 0.8286 | 0.8427 | 0.8534 | 0.8525 | 0.8476 |
| Guangdong | 0.7169 | 0.7251 | 0.7385 | 0.7630 | 0.7739 | 0.7761 | 0.7910 | 0.8041 |
| Hainan    | 0.7516 | 0.7463 | 0.7518 | 0.7619 | 0.7742 | 0.7880 | 0.7912 | 0.7945 |



**Table S3.** Calculation Results of Resource Utilization Indicators of Provinces in Western China (2005-2012).

|                | 2005   | 2006   | 2007   | 2008   | 2009   | 2010   | 2011   | 2012   |
|----------------|--------|--------|--------|--------|--------|--------|--------|--------|
| Inner Mongolia | 0.2891 | 0.3336 | 0.3752 | 0.4195 | 0.4474 | 0.4790 | 0.5130 | 0.5268 |
| Guangxi        | 0.3121 | 0.3504 | 0.3999 | 0.4299 | 0.4418 | 0.4903 | 0.5373 | 0.5547 |
| Chongqing      | 0.4467 | 0.4638 | 0.4999 | 0.5451 | 0.5919 | 0.6293 | 0.6813 | 0.6932 |
| Sichuan        | 0.4277 | 0.4620 | 0.5043 | 0.5432 | 0.5496 | 0.5911 | 0.6227 | 0.6393 |
| Guizhou        | 0.3167 | 0.2908 | 0.3157 | 0.3568 | 0.3679 | 0.4047 | 0.4437 | 0.4794 |
| Yunnan         | 0.3687 | 0.3939 | 0.4145 | 0.4500 | 0.4560 | 0.4774 | 0.5139 | 0.5328 |
| Shaanxi        | 0.4448 | 0.4841 | 0.5292 | 0.5712 | 0.5895 | 0.6333 | 0.6761 | 0.6947 |
| Gansu          | 0.2503 | 0.2921 | 0.3373 | 0.3717 | 0.3838 | 0.4270 | 0.4572 | 0.4728 |
| Qinghai        | 0.2145 | 0.1636 | 0.2144 | 0.2827 | 0.3364 | 0.3818 | 0.4221 | 0.4653 |
| Ningxia        | 0.2790 | 0.2240 | 0.2860 | 0.3391 | 0.3671 | 0.4134 | 0.4478 | 0.4620 |
| Xinjiang       | 0.2682 | 0.2986 | 0.3296 | 0.3602 | 0.3545 | 0.4222 | 0.4454 | 0.4430 |

**Table S4.** Calculation Results of Resource Utilization Indicators of Provinces in Western China (2013-2020).

|                | 2013   | 2014   | 2015   | 2016   | 2017   | 2018   | 2019   | 2020   |
|----------------|--------|--------|--------|--------|--------|--------|--------|--------|
| Inner Mongolia | 0.5507 | 0.5597 | 0.5558 | 0.5559 | 0.5285 | 0.5236 | 0.5453 | 0.5669 |
| Guangxi        | 0.5756 | 0.5788 | 0.5925 | 0.6187 | 0.6150 | 0.6208 | 0.6167 | 0.6326 |
| Chongqing      | 0.7284 | 0.7426 | 0.7727 | 0.7421 | 0.7406 | 0.7573 | 0.7481 | 0.7988 |
| Sichuan        | 0.6616 | 0.6742 | 0.6797 | 0.6905 | 0.7103 | 0.7084 | 0.7015 | 0.7146 |
| Guizhou        | 0.5459 | 0.5779 | 0.6183 | 0.6435 | 0.6695 | 0.6518 | 0.6658 | 0.6798 |
| Yunnan         | 0.5662 | 0.5689 | 0.5818 | 0.5979 | 0.6091 | 0.6098 | 0.6158 | 0.6169 |
| Shaanxi        | 0.7192 | 0.7244 | 0.7231 | 0.7372 | 0.7549 | 0.7672 | 0.7829 | 0.7786 |
| Gansu          | 0.4973 | 0.5170 | 0.5116 | 0.5217 | 0.5194 | 0.5179 | 0.5208 | 0.5337 |
| Qinghai        | 0.4831 | 0.4961 | 0.4856 | 0.5066 | 0.5126 | 0.5175 | 0.5283 | 0.5491 |
| Ningxia        | 0.4755 | 0.4669 | 0.4767 | 0.4932 | 0.4895 | 0.4862 | 0.4883 | 0.4904 |
| Xinjiang       | 0.4582 | 0.4695 | 0.4505 | 0.4524 | 0.4585 | 0.4613 | 0.4605 | 0.4597 |

**Table S5.** Calculation Results of Pollution Control Indicators of Provinces in Eastern China (2005-2012).



|           | 2005   | 2006   | 2007   | 2008   | 2009   | 2010   | 2011   | 2012   |
|-----------|--------|--------|--------|--------|--------|--------|--------|--------|
| Beijing   | 0.6328 | 0.6461 | 0.6552 | 0.6766 | 0.6730 | 0.6818 | 0.6024 | 0.6050 |
| Tianjin   | 0.5829 | 0.6033 | 0.6059 | 0.6119 | 0.6181 | 0.5846 | 0.5258 | 0.5233 |
| Hebei     | 0.1426 | 0.1386 | 0.1504 | 0.1647 | 0.1753 | 0.1739 | 0.0652 | 0.0734 |
| Shanghai  | 0.4517 | 0.4486 | 0.4515 | 0.4607 | 0.4792 | 0.4876 | 0.4661 | 0.4746 |
| Jiangsu   | 0.1648 | 0.1673 | 0.1789 | 0.1902 | 0.1978 | 0.1916 | 0.1105 | 0.1182 |
| Zhejiang  | 0.2899 | 0.2879 | 0.2933 | 0.3078 | 0.3160 | 0.3215 | 0.2323 | 0.2457 |
| Fujian    | 0.4043 | 0.4014 | 0.4220 | 0.4245 | 0.4204 | 0.4176 | 0.3197 | 0.3220 |
| Shandong  | 0.1849 | 0.1147 | 0.1236 | 0.1329 | 0.1413 | 0.1417 | 0.1035 | 0.1312 |
| Guangdong | 0.1770 | 0.1787 | 0.1662 | 0.1700 | 0.1846 | 0.1863 | 0.1624 | 0.1029 |
| Hainan    | 0.9076 | 0.8957 | 0.8777 | 0.8925 | 0.8873 | 0.8924 | 0.7167 | 0.7770 |

**Table S6.** Calculation Results of Pollution Control Indicators of Provinces in Eastern China (2013-2020).

|           | 2013   | 2014   | 2015   | 2016   | 2017   | 2018   | 2019   | 2020   |
|-----------|--------|--------|--------|--------|--------|--------|--------|--------|
| Beijing   | 0.6191 | 0.6296 | 0.6495 | 0.7587 | 0.8878 | 0.8777 | 0.8973 | 0.8969 |
| Tianjin   | 0.5267 | 0.5153 | 0.5331 | 0.6449 | 0.7182 | 0.7316 | 0.7527 | 0.7338 |
| Hebei     | 0.0695 | 0.0617 | 0.0766 | 0.1630 | 0.2881 | 0.2671 | 0.2975 | 0.3180 |
| Shanghai  | 0.4803 | 0.4736 | 0.4906 | 0.5541 | 0.6891 | 0.6751 | 0.6839 | 0.6985 |
| Jiangsu   | 0.1161 | 0.1073 | 0.1118 | 0.1726 | 0.3011 | 0.2872 | 0.2977 | 0.3182 |
| Zhejiang  | 0.2461 | 0.2477 | 0.2607 | 0.3393 | 0.4345 | 0.4571 | 0.4703 | 0.5036 |
| Fujian    | 0.3264 | 0.3138 | 0.3263 | 0.4098 | 0.4974 | 0.4797 | 0.5075 | 0.5254 |
| Shandong  | 0.0494 | 0.0383 | 0.0412 | 0.1342 | 0.2999 | 0.3152 | 0.3150 | 0.3089 |
| Guangdong | 0.1092 | 0.1093 | 0.1326 | 0.2030 | 0.2827 | 0.2744 | 0.3056 | 0.3167 |
| Hainan    | 0.7690 | 0.7432 | 0.7591 | 0.8817 | 0.8459 | 0.8683 | 0.8889 | 0.8995 |

**Table S7.** Calculation Results of Pollution Control Indicators of Provinces in Western China (2005-2012).

|  | 2005 | 2006 | 2007 | 2008 | 2009 | 2010 | 2011 | 2012 |
|--|------|------|------|------|------|------|------|------|
|--|------|------|------|------|------|------|------|------|



|                |        |        |        |        |        |        |        |        |
|----------------|--------|--------|--------|--------|--------|--------|--------|--------|
| Inner Mongolia | 0.2464 | 0.2607 | 0.2680 | 0.2598 | 0.2636 | 0.2405 | 0.1542 | 0.1496 |
| Guangxi        | 0.2245 | 0.2417 | 0.2605 | 0.2757 | 0.2765 | 0.2843 | 0.3124 | 0.3109 |
| Chongqing      | 0.4335 | 0.4280 | 0.4398 | 0.4421 | 0.4395 | 0.4439 | 0.3922 | 0.3956 |
| Sichuan        | 0.2162 | 0.2254 | 0.2531 | 0.2640 | 0.2642 | 0.2479 | 0.1832 | 0.1906 |
| Guizhou        | 0.3917 | 0.3878 | 0.3915 | 0.4049 | 0.3989 | 0.4216 | 0.3490 | 0.3520 |
| Yunnan         | 0.4581 | 0.4464 | 0.4468 | 0.4513 | 0.4547 | 0.4543 | 0.3276 | 0.3273 |
| Shaanxi        | 0.3698 | 0.3692 | 0.3727 | 0.3732 | 0.3875 | 0.3812 | 0.2910 | 0.2943 |
| Gansu          | 0.4777 | 0.4801 | 0.5085 | 0.5123 | 0.5017 | 0.4916 | 0.4038 | 0.4103 |
| Qinghai        | 0.8152 | 0.7856 | 0.7804 | 0.7719 | 0.7655 | 0.7402 | 0.7033 | 0.6909 |
| Ningxia        | 0.5886 | 0.6196 | 0.6395 | 0.6485 | 0.6517 | 0.5906 | 0.5000 | 0.5074 |
| Xinjiang       | 0.4599 | 0.4426 | 0.4353 | 0.4275 | 0.4158 | 0.4058 | 0.3101 | 0.2815 |

**Table S8.** Calculation Results of Pollution Control Indicators of Provinces in Western China (2013-2020).

|                | 2013   | 2014   | 2015   | 2016   | 2017   | 2018   | 2019   | 2020   |
|----------------|--------|--------|--------|--------|--------|--------|--------|--------|
| Inner Mongolia | 0.1608 | 0.1538 | 0.1673 | 0.3349 | 0.4914 | 0.4741 | 0.4786 | 0.4831 |
| Guangxi        | 0.3159 | 0.3084 | 0.3044 | 0.4097 | 0.4814 | 0.5144 | 0.4996 | 0.4947 |
| Chongqing      | 0.4067 | 0.3994 | 0.3988 | 0.4889 | 0.5383 | 0.5547 | 0.5576 | 0.5605 |
| Sichuan        | 0.1947 | 0.1877 | 0.2004 | 0.2981 | 0.3748 | 0.2846 | 0.3383 | 0.3720 |
| Guizhou        | 0.3554 | 0.3533 | 0.3705 | 0.4116 | 0.4617 | 0.4940 | 0.4948 | 0.5055 |
| Yunnan         | 0.3306 | 0.3405 | 0.3596 | 0.3988 | 0.4846 | 0.4625 | 0.4963 | 0.4901 |
| Shaanxi        | 0.2932 | 0.2814 | 0.2964 | 0.4530 | 0.5400 | 0.4842 | 0.5174 | 0.5306 |
| Gansu          | 0.4097 | 0.3957 | 0.4055 | 0.5236 | 0.5983 | 0.5774 | 0.5769 | 0.5864 |
| Qinghai        | 0.6851 | 0.6731 | 0.6693 | 0.7283 | 0.7943 | 0.8063 | 0.8058 | 0.7935 |
| Ningxia        | 0.5040 | 0.5066 | 0.5143 | 0.6130 | 0.6690 | 0.6481 | 0.6734 | 0.6986 |
| Xinjiang       | 0.2663 | 0.2532 | 0.2717 | 0.3802 | 0.4995 | 0.4686 | 0.4894 | 0.4902 |

**Table S9.** Calculation Results of Living Environment Indicators of Provinces in Eastern China (2005-2012).

| 2005 | 2006 | 2007 | 2008 | 2009 | 2010 | 2011 | 2012 |
|------|------|------|------|------|------|------|------|
|------|------|------|------|------|------|------|------|



|           |        |        |        |        |        |        |        |        |
|-----------|--------|--------|--------|--------|--------|--------|--------|--------|
| Beijing   | 0.6887 | 0.6654 | 0.6294 | 0.6593 | 0.7249 | 0.7273 | 0.7285 | 0.7312 |
| Tianjin   | 0.6398 | 0.6709 | 0.6699 | 0.6386 | 0.6365 | 0.6559 | 0.6729 | 0.6717 |
| Hebei     | 0.5633 | 0.5689 | 0.5771 | 0.6029 | 0.6256 | 0.6512 | 0.6496 | 0.6531 |
| Shanghai  | 0.6355 | 0.6980 | 0.7010 | 0.7016 | 0.6990 | 0.7003 | 0.7013 | 0.7029 |
| Jiangsu   | 0.6367 | 0.6539 | 0.6715 | 0.6874 | 0.6936 | 0.6996 | 0.7081 | 0.7123 |
| Zhejiang  | 0.6498 | 0.6565 | 0.6643 | 0.6775 | 0.6897 | 0.6899 | 0.6958 | 0.7051 |
| Fujian    | 0.6400 | 0.6461 | 0.6566 | 0.6748 | 0.6849 | 0.6997 | 0.7098 | 0.7165 |
| Shandong  | 0.6318 | 0.6535 | 0.6677 | 0.6729 | 0.6874 | 0.6971 | 0.7020 | 0.7088 |
| Guangdong | 0.5989 | 0.6738 | 0.6814 | 0.6945 | 0.6998 | 0.7078 | 0.7097 | 0.7121 |
| Hainan    | 0.6013 | 0.6294 | 0.6426 | 0.6313 | 0.6709 | 0.6891 | 0.6873 | 0.6594 |

**Table S10.** Calculation Results of Living Environment Indicators of Provinces in Eastern China (2013-2020).

|           | 2013   | 2014   | 2015   | 2016   | 2017   | 2018   | 2019   | 2020   |
|-----------|--------|--------|--------|--------|--------|--------|--------|--------|
| Beijing   | 0.6985 | 0.7003 | 0.7218 | 0.7637 | 0.7679 | 0.7625 | 0.7702 | 0.7780 |
| Tianjin   | 0.6085 | 0.6286 | 0.6529 | 0.6625 | 0.6538 | 0.6473 | 0.6467 | 0.6462 |
| Hebei     | 0.4727 | 0.5553 | 0.6291 | 0.6310 | 0.6250 | 0.6174 | 0.6198 | 0.6222 |
| Shanghai  | 0.6812 | 0.6877 | 0.6834 | 0.6914 | 0.6931 | 0.6969 | 0.6978 | 0.6987 |
| Jiangsu   | 0.6821 | 0.6825 | 0.7004 | 0.7047 | 0.7113 | 0.7185 | 0.7228 | 0.7272 |
| Zhejiang  | 0.6753 | 0.6809 | 0.6910 | 0.6999 | 0.7001 | 0.7067 | 0.7101 | 0.7135 |
| Fujian    | 0.7187 | 0.7138 | 0.7229 | 0.7269 | 0.7279 | 0.7490 | 0.7567 | 0.7644 |
| Shandong  | 0.5877 | 0.6236 | 0.6380 | 0.6638 | 0.6710 | 0.6555 | 0.6746 | 0.6637 |
| Guangdong | 0.6923 | 0.6994 | 0.7077 | 0.7131 | 0.7154 | 0.7314 | 0.7369 | 0.7424 |
| Hainan    | 0.6991 | 0.6986 | 0.6853 | 0.6983 | 0.7037 | 0.7212 | 0.7286 | 0.7361 |

**Table S11.** Calculation Results of Living Environment Indicators of Provinces in Western China (2005-2012).

|  | 2005 | 2006 | 2007 | 2008 | 2009 | 2010 | 2011 | 2012 |
|--|------|------|------|------|------|------|------|------|
|--|------|------|------|------|------|------|------|------|



|                |        |        |        |        |        |        |        |        |
|----------------|--------|--------|--------|--------|--------|--------|--------|--------|
| Inner Mongolia | 0.4570 | 0.4731 | 0.4887 | 0.5240 | 0.5457 | 0.5630 | 0.5895 | 0.6104 |
| Guangxi        | 0.6190 | 0.5759 | 0.5773 | 0.5907 | 0.6125 | 0.6314 | 0.6543 | 0.6691 |
| Chongqing      | 0.4389 | 0.4767 | 0.5523 | 0.5913 | 0.6177 | 0.6459 | 0.6583 | 0.6795 |
| Sichuan        | 0.5143 | 0.5409 | 0.5709 | 0.5871 | 0.6207 | 0.6469 | 0.6540 | 0.6544 |
| Guizhou        | 0.4660 | 0.4878 | 0.5083 | 0.5206 | 0.5058 | 0.5286 | 0.5598 | 0.5765 |
| Yunnan         | 0.5415 | 0.5499 | 0.5862 | 0.5808 | 0.6301 | 0.6424 | 0.6502 | 0.6606 |
| Shaanxi        | 0.4849 | 0.5375 | 0.5489 | 0.5705 | 0.5844 | 0.5964 | 0.6122 | 0.6260 |
| Gansu          | 0.4923 | 0.4648 | 0.5065 | 0.5272 | 0.5245 | 0.5250 | 0.5567 | 0.5844 |
| Qinghai        | 0.5365 | 0.5015 | 0.5184 | 0.5312 | 0.5428 | 0.5907 | 0.6064 | 0.6224 |
| Ningxia        | 0.4604 | 0.4991 | 0.5479 | 0.5898 | 0.6084 | 0.6443 | 0.6433 | 0.6537 |
| Xinjiang       | 0.5089 | 0.4985 | 0.5191 | 0.5269 | 0.5680 | 0.5864 | 0.6198 | 0.6330 |

**Table S12.** Calculation Results of Living Environment Indicators of Provinces in Western China (2013-2020).

|                | 2013   | 2014   | 2015   | 2016   | 2017   | 2018   | 2019   | 2020   |
|----------------|--------|--------|--------|--------|--------|--------|--------|--------|
| Inner Mongolia | 0.5718 | 0.6137 | 0.6460 | 0.6679 | 0.6714 | 0.6763 | 0.6742 | 0.6821 |
| Guangxi        | 0.6591 | 0.6776 | 0.6816 | 0.6858 | 0.6987 | 0.6656 | 0.6672 | 0.6718 |
| Chongqing      | 0.6346 | 0.6470 | 0.6643 | 0.6694 | 0.6606 | 0.6549 | 0.6613 | 0.6576 |
| Sichuan        | 0.5900 | 0.6325 | 0.6430 | 0.6556 | 0.6677 | 0.6654 | 0.6756 | 0.6659 |
| Guizhou        | 0.5787 | 0.5897 | 0.6299 | 0.6457 | 0.6588 | 0.6672 | 0.6727 | 0.6783 |
| Yunnan         | 0.6468 | 0.6590 | 0.6577 | 0.6642 | 0.6825 | 0.6936 | 0.7045 | 0.7055 |
| Shaanxi        | 0.5593 | 0.5701 | 0.6197 | 0.5975 | 0.5675 | 0.5652 | 0.5715 | 0.5773 |
| Gansu          | 0.5674 | 0.5887 | 0.5919 | 0.6088 | 0.6160 | 0.6024 | 0.6241 | 0.6158 |
| Qinghai        | 0.5758 | 0.6031 | 0.6003 | 0.6063 | 0.6265 | 0.6196 | 0.6089 | 0.6283 |
| Ningxia        | 0.6347 | 0.6369 | 0.6512 | 0.6588 | 0.6616 | 0.6678 | 0.6622 | 0.6796 |
| Xinjiang       | 0.6039 | 0.6230 | 0.6386 | 0.6348 | 0.6430 | 0.6466 | 0.6521 | 0.6423 |

**Table S13.** Calculation Results of Ecological Protection Indicators of Provinces in Eastern China (2005-2012).

|         | 2005   | 2006   | 2007   | 2008   | 2009   | 2010   | 2011   | 2012   |
|---------|--------|--------|--------|--------|--------|--------|--------|--------|
| Beijing | 0.4762 | 0.4753 | 0.4765 | 0.4783 | 0.5044 | 0.5030 | 0.5062 | 0.5103 |



|           |        |        |        |        |        |        |        |        |
|-----------|--------|--------|--------|--------|--------|--------|--------|--------|
| Tianjin   | 0.5345 | 0.5303 | 0.5368 | 0.5460 | 0.5601 | 0.5028 | 0.4980 | 0.4930 |
| Hebei     | 0.4763 | 0.4678 | 0.4666 | 0.4824 | 0.4912 | 0.4912 | 0.4916 | 0.5132 |
| Shanghai  | 0.5336 | 0.5360 | 0.4921 | 0.5159 | 0.6290 | 0.5161 | 0.5086 | 0.5070 |
| Jiangsu   | 0.5377 | 0.5242 | 0.5150 | 0.5081 | 0.5277 | 0.4975 | 0.4927 | 0.4927 |
| Zhejiang  | 0.5055 | 0.5008 | 0.4994 | 0.4924 | 0.5134 | 0.4863 | 0.4925 | 0.4931 |
| Fujian    | 0.5496 | 0.5419 | 0.5445 | 0.5443 | 0.5458 | 0.5509 | 0.5696 | 0.5582 |
| Shandong  | 0.5487 | 0.5477 | 0.5497 | 0.5553 | 0.5698 | 0.5431 | 0.5430 | 0.5377 |
| Guangdong | 0.5717 | 0.5624 | 0.5607 | 0.5699 | 0.5833 | 0.6341 | 0.6343 | 0.6318 |
| Hainan    | 0.5831 | 0.5808 | 0.5758 | 0.5784 | 0.5847 | 0.6095 | 0.6070 | 0.6113 |

**Table S14.** Calculation Results of Ecological Protection Indicators of Provinces in Eastern China (2013-2020).

|           | 2013   | 2014   | 2015   | 2016   | 2017   | 2018   | 2019   | 2020   |
|-----------|--------|--------|--------|--------|--------|--------|--------|--------|
| Beijing   | 0.5448 | 0.5395 | 0.5422 | 0.5417 | 0.5462 | 0.5606 | 0.5676 | 0.5747 |
| Tianjin   | 0.5471 | 0.5502 | 0.5482 | 0.5500 | 0.5516 | 0.5431 | 0.5543 | 0.5655 |
| Hebei     | 0.5166 | 0.5197 | 0.5235 | 0.5540 | 0.5398 | 0.5497 | 0.5564 | 0.5731 |
| Shanghai  | 0.4982 | 0.5013 | 0.5576 | 0.5617 | 0.5529 | 0.5389 | 0.5399 | 0.5410 |
| Jiangsu   | 0.5521 | 0.5511 | 0.5457 | 0.5427 | 0.5440 | 0.5419 | 0.5442 | 0.5465 |
| Zhejiang  | 0.4626 | 0.4621 | 0.4785 | 0.4760 | 0.4740 | 0.4651 | 0.4619 | 0.4587 |
| Fujian    | 0.5531 | 0.5450 | 0.5764 | 0.5732 | 0.5739 | 0.5633 | 0.5658 | 0.5783 |
| Shandong  | 0.5430 | 0.5436 | 0.5452 | 0.5341 | 0.5334 | 0.5453 | 0.5338 | 0.5523 |
| Guangdong | 0.6587 | 0.6603 | 0.6903 | 0.6786 | 0.6742 | 0.7059 | 0.7176 | 0.7294 |
| Hainan    | 0.6160 | 0.6120 | 0.6195 | 0.6158 | 0.6147 | 0.6278 | 0.6317 | 0.6355 |

**Table S15.** Calculation Results of Ecological Protection Indicators of Provinces in Western China (2005-2012).

|                | 2005   | 2006   | 2007   | 2008   | 2009   | 2010   | 2011   | 2012   |
|----------------|--------|--------|--------|--------|--------|--------|--------|--------|
| Inner Mongolia | 0.6887 | 0.6685 | 0.7080 | 0.7238 | 0.6916 | 0.7271 | 0.7352 | 0.7396 |
| Guangxi        | 0.5741 | 0.5687 | 0.5690 | 0.5701 | 0.5999 | 0.6020 | 0.6027 | 0.6028 |



|           |        |        |        |        |        |        |        |        |
|-----------|--------|--------|--------|--------|--------|--------|--------|--------|
| Chongqing | 0.3936 | 0.3809 | 0.3927 | 0.3951 | 0.4218 | 0.4347 | 0.4369 | 0.4316 |
| Sichuan   | 0.7350 | 0.7215 | 0.7450 | 0.7645 | 0.7677 | 0.7607 | 0.7492 | 0.7342 |
| Guizhou   | 0.3981 | 0.3963 | 0.4085 | 0.4093 | 0.4351 | 0.4312 | 0.4307 | 0.4241 |
| Yunnan    | 0.5657 | 0.5600 | 0.5784 | 0.5742 | 0.6077 | 0.6083 | 0.6042 | 0.5938 |
| Shaanxi   | 0.4964 | 0.5019 | 0.5086 | 0.5132 | 0.5481 | 0.5457 | 0.5421 | 0.5414 |
| Gansu     | 0.6034 | 0.5997 | 0.6005 | 0.5646 | 0.5981 | 0.5982 | 0.5923 | 0.5906 |
| Qinghai   | 0.6211 | 0.6086 | 0.6289 | 0.5619 | 0.6454 | 0.6421 | 0.6494 | 0.6443 |
| Ningxia   | 0.4785 | 0.4689 | 0.4719 | 0.4770 | 0.5059 | 0.5070 | 0.5115 | 0.5122 |
| Xinjiang  | 0.4382 | 0.4315 | 0.4377 | 0.4509 | 0.4493 | 0.4330 | 0.4280 | 0.4271 |

**Table S16.** Calculation Results of Ecological Protection Indicators of Provinces in Western China (2013-2020).

|                | 2013   | 2014   | 2015   | 2016   | 2017   | 2018   | 2019   | 2020   |
|----------------|--------|--------|--------|--------|--------|--------|--------|--------|
| Inner Mongolia | 0.7663 | 0.7413 | 0.7493 | 0.7405 | 0.7469 | 0.7670 | 0.7730 | 0.7790 |
| Guangxi        | 0.6195 | 0.6186 | 0.6176 | 0.6170 | 0.6148 | 0.6215 | 0.6363 | 0.6310 |
| Chongqing      | 0.6089 | 0.6039 | 0.6086 | 0.6058 | 0.6021 | 0.6088 | 0.6121 | 0.6154 |
| Sichuan        | 0.7729 | 0.7699 | 0.7924 | 0.8068 | 0.8145 | 0.8062 | 0.8122 | 0.8182 |
| Guizhou        | 0.5134 | 0.5107 | 0.5346 | 0.5340 | 0.5599 | 0.5611 | 0.5755 | 0.5899 |
| Yunnan         | 0.6436 | 0.6312 | 0.6473 | 0.6389 | 0.6278 | 0.6551 | 0.6621 | 0.6690 |
| Shaanxi        | 0.5610 | 0.5598 | 0.5624 | 0.5515 | 0.5565 | 0.5772 | 0.5809 | 0.5863 |
| Gansu          | 0.6107 | 0.6161 | 0.6620 | 0.6627 | 0.6621 | 0.6543 | 0.6601 | 0.6669 |
| Qinghai        | 0.6873 | 0.6848 | 0.6824 | 0.6903 | 0.6927 | 0.7071 | 0.7154 | 0.7237 |
| Ningxia        | 0.5275 | 0.5248 | 0.4984 | 0.5001 | 0.4979 | 0.5105 | 0.5077 | 0.5068 |
| Xinjiang       | 0.4955 | 0.4936 | 0.5129 | 0.5107 | 0.5133 | 0.5156 | 0.5230 | 0.5305 |

**Table S17.** Calculation Results of Circular Economy Indicators of Provinces in Eastern China (2005-2012).

|         | 2005   | 2006   | 2007   | 2008   | 2009   | 2010   | 2011   | 2012   |
|---------|--------|--------|--------|--------|--------|--------|--------|--------|
| Beijing | 0.8511 | 0.8538 | 0.7892 | 0.8204 | 0.8233 | 0.7908 | 0.8276 | 0.8563 |
| Tianjin | 0.8032 | 0.8183 | 0.8211 | 0.8172 | 0.8353 | 0.8477 | 0.8426 | 0.8211 |



|           |        |        |        |        |        |        |        |        |
|-----------|--------|--------|--------|--------|--------|--------|--------|--------|
| Hebei     | 0.7998 | 0.7946 | 0.7934 | 0.8062 | 0.8025 | 0.8194 | 0.8128 | 0.8231 |
| Shanghai  | 0.8750 | 0.8702 | 0.8662 | 0.8645 | 0.8635 | 0.8621 | 0.8624 | 0.9043 |
| Jiangsu   | 0.8844 | 0.8785 | 0.8812 | 0.8877 | 0.9342 | 0.8836 | 0.9342 | 0.9260 |
| Zhejiang  | 0.8868 | 0.8726 | 0.8820 | 0.8785 | 0.8762 | 0.9273 | 0.8769 | 0.9315 |
| Fujian    | 0.8368 | 0.8873 | 0.8855 | 0.8873 | 0.8907 | 0.8909 | 0.8856 | 0.8798 |
| Shandong  | 0.8925 | 0.9414 | 0.8929 | 0.8872 | 0.8866 | 0.8855 | 0.8813 | 0.9305 |
| Guangdong | 0.8742 | 0.9024 | 0.9207 | 0.9227 | 0.9168 | 0.9159 | 0.9063 | 0.9078 |
| Hainan    | 0.7905 | 0.8029 | 0.8145 | 0.8185 | 0.8553 | 0.8578 | 0.8196 | 0.8506 |

**Table S18.** Calculation Results of Circular Economy Indicators of Provinces in Eastern China (2013-2020).

|           | 2013   | 2014   | 2015   | 2016   | 2017   | 2018   | 2019   | 2020   |
|-----------|--------|--------|--------|--------|--------|--------|--------|--------|
| Beijing   | 0.8580 | 0.8445 | 0.8346 | 0.8370 | 0.8320 | 0.8556 | 0.8592 | 0.8710 |
| Tianjin   | 0.8425 | 0.8562 | 0.8588 | 0.8645 | 0.8371 | 0.8652 | 0.8544 | 0.8976 |
| Hebei     | 0.8252 | 0.8159 | 0.8352 | 0.8321 | 0.8141 | 0.8207 | 0.8267 | 0.8205 |
| Shanghai  | 0.8897 | 0.8594 | 0.8867 | 0.8828 | 0.9094 | 0.9002 | 0.9055 | 0.9183 |
| Jiangsu   | 0.9328 | 0.9308 | 0.9280 | 0.9201 | 0.9244 | 0.9123 | 0.9253 | 0.9289 |
| Zhejiang  | 0.9387 | 0.9249 | 0.9249 | 0.9266 | 0.9185 | 0.9257 | 0.9270 | 0.9346 |
| Fujian    | 0.8839 | 0.8757 | 0.8561 | 0.8343 | 0.8590 | 0.8564 | 0.8859 | 0.8987 |
| Shandong  | 0.9300 | 0.9265 | 0.9223 | 0.9117 | 0.8935 | 0.9050 | 0.9216 | 0.9377 |
| Guangdong | 0.8909 | 0.8841 | 0.8926 | 0.8886 | 0.8671 | 0.8948 | 0.8971 | 0.9092 |
| Hainan    | 0.8581 | 0.8680 | 0.8716 | 0.8694 | 0.8726 | 0.8849 | 0.8670 | 0.8751 |

**Table S19.** Calculation Results of Circular Economy Indicators of Provinces in Western China (2005-2012).

|                | 2005   | 2006   | 2007   | 2008   | 2009   | 2010   | 2011   | 2012   |
|----------------|--------|--------|--------|--------|--------|--------|--------|--------|
| Inner Mongolia | 0.4881 | 0.5121 | 0.5157 | 0.5546 | 0.5120 | 0.5561 | 0.4851 | 0.5298 |
| Guangxi        | 0.5225 | 0.5127 | 0.5360 | 0.5662 | 0.5782 | 0.5793 | 0.5548 | 0.5753 |



|           |        |        |        |        |        |        |        |        |
|-----------|--------|--------|--------|--------|--------|--------|--------|--------|
| Chongqing | 0.3886 | 0.4034 | 0.4415 | 0.4960 | 0.4408 | 0.5209 | 0.6419 | 0.5425 |
| Sichuan   | 0.5201 | 0.5501 | 0.5345 | 0.5536 | 0.5466 | 0.5336 | 0.5228 | 0.5115 |
| Guizhou   | 0.5589 | 0.6016 | 0.4885 | 0.5146 | 0.4952 | 0.5095 | 0.5301 | 0.5421 |
| Yunnan    | 0.4636 | 0.5802 | 0.4557 | 0.6111 | 0.5883 | 0.5733 | 0.5025 | 0.4175 |
| Shaanxi   | 0.4470 | 0.5097 | 0.5056 | 0.5291 | 0.5617 | 0.5611 | 0.5683 | 0.5723 |
| Gansu     | 0.4371 | 0.4095 | 0.5179 | 0.5045 | 0.5153 | 0.4846 | 0.4987 | 0.4622 |
| Qinghai   | 0.5453 | 0.5467 | 0.5569 | 0.5481 | 0.5350 | 0.5431 | 0.5579 | 0.5523 |
| Ningxia   | 0.5067 | 0.5485 | 0.5583 | 0.5565 | 0.5405 | 0.5431 | 0.5535 | 0.5554 |
| Xinjiang  | 0.4299 | 0.4375 | 0.4570 | 0.4572 | 0.4229 | 0.4415 | 0.4573 | 0.4548 |

**Table S20.** Calculation Results of Circular Economy Indicators of Provinces in Western China (2013-2020).

|                | 2013   | 2014   | 2015   | 2016   | 2017   | 2018   | 2019   | 2020   |
|----------------|--------|--------|--------|--------|--------|--------|--------|--------|
| Inner Mongolia | 0.5878 | 0.6017 | 0.5655 | 0.5652 | 0.4984 | 0.5325 | 0.5297 | 0.5211 |
| Guangxi        | 0.6331 | 0.6149 | 0.6103 | 0.6062 | 0.5868 | 0.5838 | 0.5733 | 0.5811 |
| Chongqing      | 0.5937 | 0.5877 | 0.5853 | 0.5734 | 0.5494 | 0.5693 | 0.5391 | 0.5378 |
| Sichuan        | 0.5418 | 0.5333 | 0.5371 | 0.5280 | 0.5320 | 0.5233 | 0.5562 | 0.5675 |
| Guizhou        | 0.5711 | 0.5765 | 0.5822 | 0.5559 | 0.5163 | 0.5623 | 0.5644 | 0.5539 |
| Yunnan         | 0.4768 | 0.5541 | 0.5768 | 0.5729 | 0.5446 | 0.5779 | 0.5145 | 0.5969 |
| Shaanxi        | 0.6176 | 0.6210 | 0.6451 | 0.6223 | 0.5182 | 0.5815 | 0.6039 | 0.5667 |
| Gansu          | 0.5323 | 0.5160 | 0.5042 | 0.5073 | 0.5009 | 0.5172 | 0.5138 | 0.5228 |
| Qinghai        | 0.6148 | 0.6108 | 0.6306 | 0.6119 | 0.6333 | 0.6342 | 0.6447 | 0.6489 |
| Ningxia        | 0.5834 | 0.5878 | 0.5929 | 0.4793 | 0.4516 | 0.5169 | 0.5397 | 0.5334 |
| Xinjiang       | 0.5099 | 0.5145 | 0.5214 | 0.5051 | 0.5221 | 0.5519 | 0.5530 | 0.5626 |

**Table S21.** Calculation Results of Economic Growth Quality Indicators of Provinces in Eastern China (2005-2012).

|         | 2005   | 2006   | 2007   | 2008   | 2009   | 2010   | 2011   | 2012   |
|---------|--------|--------|--------|--------|--------|--------|--------|--------|
| Beijing | 0.6001 | 0.6292 | 0.6558 | 0.6774 | 0.6947 | 0.7122 | 0.7335 | 0.7517 |
| Tianjin | 0.4380 | 0.4560 | 0.4783 | 0.4942 | 0.5472 | 0.5785 | 0.6096 | 0.6374 |



|           |        |        |        |        |        |        |        |        |
|-----------|--------|--------|--------|--------|--------|--------|--------|--------|
| Hebei     | 0.2886 | 0.3124 | 0.3384 | 0.3572 | 0.3840 | 0.4062 | 0.4307 | 0.4547 |
| Shanghai  | 0.5602 | 0.5824 | 0.6190 | 0.6395 | 0.6699 | 0.6865 | 0.7096 | 0.7314 |
| Jiangsu   | 0.4127 | 0.4480 | 0.4906 | 0.5288 | 0.5578 | 0.6060 | 0.6506 | 0.6871 |
| Zhejiang  | 0.4470 | 0.4712 | 0.4989 | 0.5171 | 0.5403 | 0.5688 | 0.5960 | 0.6219 |
| Fujian    | 0.3770 | 0.4004 | 0.4295 | 0.4504 | 0.4765 | 0.4936 | 0.5196 | 0.5422 |
| Shandong  | 0.3264 | 0.3563 | 0.3927 | 0.4208 | 0.4482 | 0.4844 | 0.5250 | 0.5626 |
| Guangdong | 0.4863 | 0.5153 | 0.5463 | 0.5717 | 0.5993 | 0.6346 | 0.6661 | 0.6930 |
| Hainan    | 0.2669 | 0.2854 | 0.3148 | 0.3455 | 0.3873 | 0.4254 | 0.4565 | 0.4916 |

**Table S22.** Calculation Results of Economic Growth Quality Indicators of Provinces in Eastern China (2013-2020).

|           | 2013   | 2014   | 2015   | 2016   | 2017   | 2018   | 2019   | 2020   |
|-----------|--------|--------|--------|--------|--------|--------|--------|--------|
| Beijing   | 0.7727 | 0.7899 | 0.8062 | 0.8227 | 0.8099 | 0.8067 | 0.8151 | 0.8236 |
| Tianjin   | 0.6541 | 0.6753 | 0.6967 | 0.7243 | 0.7421 | 0.7315 | 0.7382 | 0.7348 |
| Hebei     | 0.4723 | 0.4969 | 0.5254 | 0.5463 | 0.5724 | 0.5937 | 0.5871 | 0.5605 |
| Shanghai  | 0.7507 | 0.7733 | 0.7947 | 0.8150 | 0.7654 | 0.8023 | 0.8127 | 0.8230 |
| Jiangsu   | 0.7120 | 0.7383 | 0.7623 | 0.7836 | 0.7954 | 0.7725 | 0.7959 | 0.7993 |
| Zhejiang  | 0.6485 | 0.6734 | 0.6978 | 0.7202 | 0.7439 | 0.7412 | 0.7462 | 0.7613 |
| Fujian    | 0.5558 | 0.5757 | 0.6021 | 0.6271 | 0.6553 | 0.6726 | 0.6750 | 0.6974 |
| Shandong  | 0.5893 | 0.6216 | 0.6484 | 0.6700 | 0.6875 | 0.6979 | 0.7094 | 0.7108 |
| Guangdong | 0.7128 | 0.7375 | 0.7620 | 0.7096 | 0.7221 | 0.7379 | 0.7610 | 0.7722 |
| Hainan    | 0.5132 | 0.5464 | 0.5667 | 0.5852 | 0.6070 | 0.6058 | 0.6079 | 0.6293 |

**Table S23.** Calculation Results of Economic Growth Quality Indicators of Provinces in Western China (2005-2012).

|                | 2005   | 2006   | 2007   | 2008   | 2009   | 2010   | 2011   | 2012   |
|----------------|--------|--------|--------|--------|--------|--------|--------|--------|
| Inner Mongolia | 0.3080 | 0.3283 | 0.3512 | 0.3711 | 0.4174 | 0.4289 | 0.4551 | 0.4791 |
| Guangxi        | 0.2758 | 0.2928 | 0.3226 | 0.3455 | 0.3632 | 0.3776 | 0.3961 | 0.4270 |



|           |        |        |        |        |        |        |        |        |
|-----------|--------|--------|--------|--------|--------|--------|--------|--------|
| Chongqing | 0.3213 | 0.3434 | 0.3605 | 0.3893 | 0.3902 | 0.4084 | 0.4441 | 0.4895 |
| Sichuan   | 0.2797 | 0.2984 | 0.3261 | 0.3448 | 0.3744 | 0.3920 | 0.4175 | 0.4512 |
| Guizhou   | 0.2859 | 0.2373 | 0.2818 | 0.3168 | 0.3669 | 0.3885 | 0.4281 | 0.4501 |
| Yunnan    | 0.2454 | 0.2638 | 0.2962 | 0.3273 | 0.3527 | 0.3745 | 0.4134 | 0.4352 |
| Shaanxi   | 0.2579 | 0.2694 | 0.2981 | 0.3225 | 0.3726 | 0.3899 | 0.4123 | 0.4360 |
| Gansu     | 0.2288 | 0.2447 | 0.2634 | 0.2930 | 0.3141 | 0.3283 | 0.3654 | 0.3972 |
| Qinghai   | 0.2443 | 0.1778 | 0.2170 | 0.2254 | 0.2667 | 0.2986 | 0.3092 | 0.3593 |
| Ningxia   | 0.2254 | 0.2287 | 0.2650 | 0.2947 | 0.3474 | 0.3728 | 0.4019 | 0.4210 |
| Xinjiang  | 0.2184 | 0.2085 | 0.2527 | 0.2587 | 0.2894 | 0.3036 | 0.3452 | 0.3447 |

**Table S24.** Calculation Results of Economic Growth Quality Indicators of Provinces in Western China (2013-2020).

|                | 2013   | 2014   | 2015   | 2016   | 2017   | 2018   | 2019   | 2020   |
|----------------|--------|--------|--------|--------|--------|--------|--------|--------|
| Inner Mongolia | 0.5079 | 0.5397 | 0.5552 | 0.5826 | 0.6138 | 0.6360 | 0.6616 | 0.6672 |
| Guangxi        | 0.4557 | 0.4840 | 0.5044 | 0.5240 | 0.5586 | 0.5625 | 0.5757 | 0.5790 |
| Chongqing      | 0.5177 | 0.5656 | 0.5886 | 0.6117 | 0.6313 | 0.6578 | 0.6651 | 0.6725 |
| Sichuan        | 0.4831 | 0.5203 | 0.5566 | 0.5916 | 0.6175 | 0.6356 | 0.6642 | 0.6829 |
| Guizhou        | 0.4705 | 0.4822 | 0.5031 | 0.5194 | 0.5374 | 0.5410 | 0.5461 | 0.5612 |
| Yunnan         | 0.4622 | 0.4845 | 0.5082 | 0.5315 | 0.5516 | 0.5572 | 0.5635 | 0.5897 |
| Shaanxi        | 0.4604 | 0.4911 | 0.5251 | 0.5494 | 0.5659 | 0.5794 | 0.5862 | 0.5831 |
| Gansu          | 0.4311 | 0.4642 | 0.5004 | 0.5226 | 0.5449 | 0.5710 | 0.5788 | 0.5866 |
| Qinghai        | 0.3909 | 0.4360 | 0.4849 | 0.5093 | 0.5391 | 0.5421 | 0.5462 | 0.5519 |
| Ningxia        | 0.4407 | 0.4680 | 0.5140 | 0.5375 | 0.5584 | 0.5740 | 0.5831 | 0.6021 |
| Xinjiang       | 0.3912 | 0.4401 | 0.5074 | 0.5247 | 0.5434 | 0.5613 | 0.5707 | 0.5905 |

**Table S25.** Comprehensive Evaluation Results of Green Development Levels of Provinces in Eastern and Western China (2005-2012).

|         | 2005   | 2006   | 2007   | 2008   | 2009   | 2010   | 2011   | 2012   |
|---------|--------|--------|--------|--------|--------|--------|--------|--------|
| Beijing | 3.8412 | 3.8827 | 3.8453 | 3.9850 | 4.1127 | 4.1362 | 4.1435 | 4.2351 |
| Tianjin | 3.5925 | 3.7010 | 3.7484 | 3.8012 | 3.8942 | 3.9036 | 3.9218 | 3.9390 |
| Hebei   | 2.7462 | 2.7778 | 2.8521 | 2.9797 | 3.0598 | 3.1611 | 3.1081 | 3.1935 |



|                |        |        |        |        |        |        |        |        |
|----------------|--------|--------|--------|--------|--------|--------|--------|--------|
| Shanghai       | 3.6179 | 3.7383 | 3.7658 | 3.8431 | 4.0005 | 3.9447 | 3.9725 | 4.0565 |
| Jiangsu        | 3.1295 | 3.1943 | 3.2996 | 3.4080 | 3.5415 | 3.5447 | 3.6097 | 3.6765 |
| Zhejiang       | 3.3008 | 3.3493 | 3.4240 | 3.4853 | 3.5619 | 3.6589 | 3.5946 | 3.7132 |
| Fujian         | 3.2306 | 3.3203 | 3.3937 | 3.5058 | 3.5762 | 3.6612 | 3.6546 | 3.6982 |
| Shandong       | 3.1685 | 3.2223 | 3.2670 | 3.3560 | 3.4376 | 3.4811 | 3.5138 | 3.6482 |
| Guangdong      | 3.1926 | 3.3669 | 3.4422 | 3.5270 | 3.6029 | 3.7224 | 3.7561 | 3.7426 |
| Hainan         | 3.6839 | 3.7315 | 3.7720 | 3.8581 | 3.9849 | 4.1276 | 3.9495 | 4.1260 |
| Inner Mongolia | 2.4773 | 2.5763 | 2.7068 | 2.8528 | 2.8777 | 2.9946 | 2.9321 | 3.0353 |
| Guangxi        | 2.5280 | 2.5422 | 2.6653 | 2.7781 | 2.8721 | 2.9649 | 3.0576 | 3.1398 |
| Chongqing      | 2.4226 | 2.4962 | 2.6867 | 2.8589 | 2.9019 | 3.0831 | 3.2547 | 3.2319 |
| Sichuan        | 2.6930 | 2.7983 | 2.9339 | 3.0572 | 3.1232 | 3.1722 | 3.1494 | 3.1812 |
| Guizhou        | 2.4173 | 2.4016 | 2.3943 | 2.5230 | 2.5698 | 2.6841 | 2.7414 | 2.8242 |
| Yunnan         | 2.6430 | 2.7942 | 2.7778 | 2.9947 | 3.0895 | 3.1302 | 3.0118 | 2.9672 |
| Shaanxi        | 2.5008 | 2.6718 | 2.7631 | 2.8797 | 3.0438 | 3.1076 | 3.1020 | 3.1647 |
| Gansu          | 2.4896 | 2.4909 | 2.7341 | 2.7733 | 2.8375 | 2.8547 | 2.8741 | 2.9175 |
| Qinghai        | 2.9769 | 2.7838 | 2.9160 | 2.9212 | 3.0918 | 3.1965 | 3.2483 | 3.3345 |
| Ningxia        | 2.5386 | 2.5888 | 2.7686 | 2.9056 | 3.0210 | 3.0712 | 3.0580 | 3.1117 |
| Xinjiang       | 2.3235 | 2.3172 | 2.4314 | 2.4814 | 2.4999 | 2.5925 | 2.6058 | 2.5841 |

**Table S26.** Comprehensive Evaluation Results of Green Development Levels of Provinces in Eastern and Western China (2013-2020).

|          | 2013   | 2014   | 2015   | 2016   | 2017   | 2018   | 2019   | 2020   |
|----------|--------|--------|--------|--------|--------|--------|--------|--------|
| Beijing  | 4.3012 | 4.3267 | 4.4144 | 4.6006 | 4.6478 | 4.6859 | 4.7653 | 4.8233 |
| Tianjin  | 3.9956 | 4.0569 | 4.1310 | 4.2989 | 4.3451 | 4.3774 | 4.4079 | 4.4325 |
| Hebei    | 3.0565 | 3.1468 | 3.2880 | 3.4405 | 3.5523 | 3.5630 | 3.6133 | 3.6222 |
| Shanghai | 3.9910 | 4.0535 | 4.1630 | 4.2655 | 4.3860 | 4.3891 | 4.4115 | 4.4633 |



---

|                |        |        |        |        |        |        |        |        |
|----------------|--------|--------|--------|--------|--------|--------|--------|--------|
| Jiangsu        | 3.7522 | 3.7700 | 3.8346 | 3.8454 | 4.0942 | 4.0257 | 4.1047 | 4.1343 |
| Zhejiang       | 3.7053 | 3.7278 | 3.8027 | 3.9345 | 4.0535 | 4.0812 | 4.1124 | 4.1802 |
| Fujian         | 3.7457 | 3.7319 | 3.8076 | 3.9273 | 4.0720 | 4.0702 | 4.1509 | 4.2448 |
| Shandong       | 3.5076 | 3.5690 | 3.6165 | 3.7424 | 3.9280 | 3.9723 | 4.0069 | 4.0210 |
| Guangdong      | 3.7808 | 3.8157 | 3.9237 | 3.9559 | 4.0354 | 4.1205 | 4.2092 | 4.2740 |
| Hainan         | 4.2070 | 4.2145 | 4.2540 | 4.4123 | 4.4181 | 4.4960 | 4.5153 | 4.5700 |
| Inner Mongolia | 3.1453 | 3.2099 | 3.2391 | 3.4470 | 3.5504 | 3.6095 | 3.6624 | 3.6994 |
| Guangxi        | 3.2589 | 3.2823 | 3.3108 | 3.4614 | 3.5553 | 3.5686 | 3.5688 | 3.5902 |
| Chongqing      | 3.4900 | 3.5462 | 3.6183 | 3.6913 | 3.7223 | 3.8028 | 3.7833 | 3.8426 |
| Sichuan        | 3.2441 | 3.3179 | 3.4092 | 3.5706 | 3.7168 | 3.6235 | 3.7480 | 3.8211 |
| Guizhou        | 3.0350 | 3.0903 | 3.2386 | 3.3101 | 3.4036 | 3.4774 | 3.5193 | 3.5686 |
| Yunnan         | 3.1262 | 3.2382 | 3.3314 | 3.4042 | 3.5002 | 3.5561 | 3.5567 | 3.6681 |
| Shaanxi        | 3.2107 | 3.2478 | 3.3718 | 3.5109 | 3.5030 | 3.5547 | 3.6428 | 3.6226 |
| Gansu          | 3.0485 | 3.0977 | 3.1756 | 3.3467 | 3.4416 | 3.4402 | 3.4745 | 3.5122 |
| Qinghai        | 3.4370 | 3.5039 | 3.5531 | 3.6527 | 3.7985 | 3.8268 | 3.8493 | 3.8954 |
| Ningxia        | 3.1658 | 3.1910 | 3.2475 | 3.2819 | 3.3280 | 3.4035 | 3.4544 | 3.5109 |
| Xinjiang       | 2.7250 | 2.7939 | 2.9025 | 3.0079 | 3.1798 | 3.2053 | 3.2487 | 3.2758 |

---
